# Supplementary material for: Synthesis of VO2 nanoparticles by a hydrothermal-assisted homogeneous precipitation approach for thermochromic applications
Source: Royal Society of Chemistry journal article supplement (doi:10.1039/c3ra47666a), 2014-01-01
Supplement: c3ra47666a1.pdf [file c3ra47666a1.pdf]

Supplementary Information

## **Synthesis of VO<sub>2</sub> nanoparticles by hydrothermal-assisted homogeneous precipitation approach for thermochromic applications**

Wenjing Li,<sup>a,b</sup> Shidong Ji,<sup>a</sup> Yamei Li,<sup>a,b</sup> Aibin Huang,<sup>a,b</sup> Hongjie Luo<sup>a,d</sup> and Ping Jin<sup>\*a,c</sup>

<sup>a</sup> State Key Laboratory of High Performance Ceramics and Superfine Microstructure, Shanghai Institute of Ceramics, Chinese Academy of Sciences, Dingxi 1295, Changning, Shanghai, 200050, China, Tel/Fax: +86-21-6990-6208 Email: p-jin@mail.sic.ac.cn.

<sup>b</sup> Graduate School of Chinese Academy of Sciences, Beijing 100049, China

<sup>c</sup> Materials Research Institute for Sustainable Development, National Institute of Advanced Industrial Science and Technology (AIST), 2266-98 Shimoshidami, Moriyama-ku, Nagoya 463-8560, Japan

<sup>d</sup> School of Materials Science and Engineering, Shanghai University, Shangda Rd.99, Baoshan District, Shanghai 200444, China

Supplementary Results:

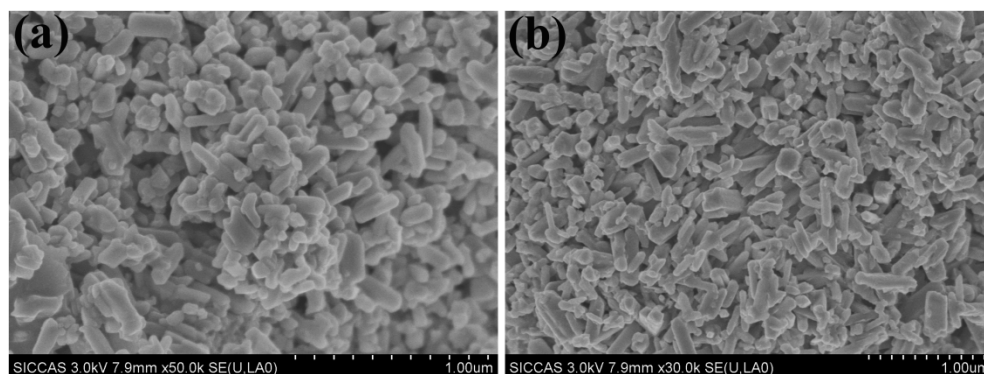

**Fig. S1** The SEM images of the (a) undoped and (b) doped samples at the same initial vanadium source concentration

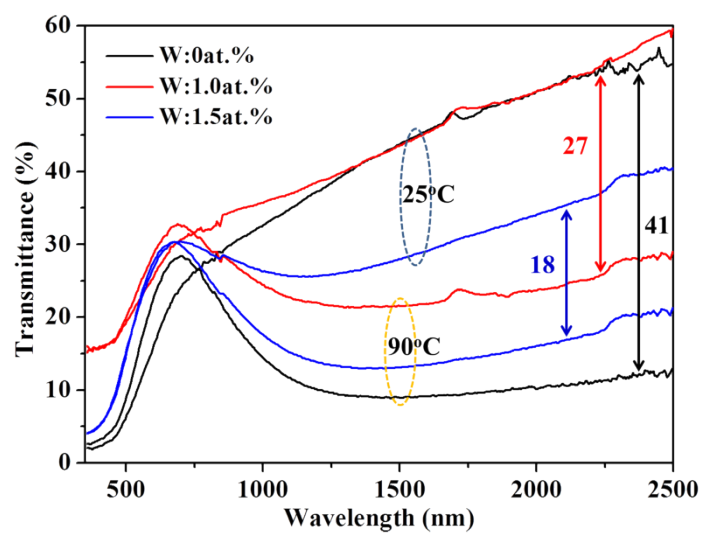

**Fig. S2** The transmittance spectra for the films with different doping amount of tungsten measured at 25°C and 90°C respectively.
